# Supplementary material for: Hands-on Tutorial on a Modeling Framework for Projections of Climate Change Impacts on Health
Source: PubMed Central journal article supplement — Epidemiology. 2019 Apr 8;30(3):321–9. doi: 10.1097/EDE.0000000000000982 (PMC6533172; doi:10.1097/ede.0000000000000982), 2019-04-08
Supplement: EMS81529-supplement-Supplemental_Digital_Content_7.pdf [file EMS81529-supplement-Supplemental_Digital_Content_7.pdf]

## DESCRIPTION OF THE VARIABLES

### “Indn\_obs.csv”

| VARIABLE NAME | DESCRIPTION                                                    |
|---------------|----------------------------------------------------------------|
| date          | date of death                                                  |
| year          | year of death                                                  |
| month         | month of death                                                 |
| day           | day of death                                                   |
| doy           | day of the year corresponding to the date of death             |
| dow           | day of the week corresponding to the date of death             |
| all           | daily number of total deaths (all cause)                       |
| all_0_64      | daily number of deaths below 65 years old (all cause)          |
| all_65_74     | daily number of deaths between 65 and 74 years old (all cause) |
| all_75_84     | daily number of deaths between 75 and 84 years old (all cause) |
| all_85plus    | daily number of deaths above 84 years old (all cause)          |
| tmean         | mean daily temperature (°C)                                    |
| tmin          | minimum daily temperature (°C)                                 |
| tmax          | maximum daily temperature (°C)                                 |

### “Indn\_rcp4p5.csv”

| VARIABLE NAME | DESCRIPTION                                                                                  |
|---------------|----------------------------------------------------------------------------------------------|
| date          | date                                                                                         |
| tmean_gfdl    | modelled daily average temperature obtained from GFDL-ESM2M model under RCP 4.5 scenario     |
| tmean_hadgem2 | modelled daily average temperature obtained from HadGEM2-ES model under RCP 4.5 scenario     |
| tmean_ipsl    | modelled daily average temperature obtained from IPSL-CM5A-LR model under RCP 4.5 scenario   |
| tmean_miroc   | modelled daily average temperature obtained from MIROC-ESM-CHEM model under RCP 4.5 scenario |
| tmean_noresm1 | modelled daily average temperature obtained from NorESM1-M model under RCP 4.5 scenario      |

### “Indn\_rcp8p5.csv”

| VARIABLE NAME | DESCRIPTION                                                                                  |
|---------------|----------------------------------------------------------------------------------------------|
| date          | date                                                                                         |
| tmean_gfdl    | modelled daily average temperature obtained from GFDL-ESM2M model under RCP 8.5 scenario     |
| tmean_hadgem2 | modelled daily average temperature obtained from HadGEM2-ES model under RCP 8.5 scenario     |
| tmean_ipsl    | modelled daily average temperature obtained from IPSL-CM5A-LR model under RCP 8.5 scenario   |
| tmean_miroc   | modelled daily average temperature obtained from MIROC-ESM-CHEM model under RCP 8.5 scenario |
| tmean_noresm1 | modelled daily average temperature obtained from NorESM1-M model under RCP 8.5 scenario      |
